# Supplementary material
Source: MDPI journal article supplement (https://www.mdpi.com/2073-4468/11/2/38)
Supplement: s1 [file s1]

**Supplementary Table S1: STARD checklist**

| Section & Topic          | No         | Item                                                                                                                                                   | Reported on page #    |
|--------------------------|------------|--------------------------------------------------------------------------------------------------------------------------------------------------------|-----------------------|
| <b>TITLE OR ABSTRACT</b> |            |                                                                                                                                                        |                       |
|                          | <b>1</b>   | Identification as a study of diagnostic accuracy using at least one measure of accuracy (such as sensitivity, specificity, predictive values, or AUC)  | <b>2</b>              |
| <b>ABSTRACT</b>          |            |                                                                                                                                                        |                       |
|                          | <b>2</b>   | Structured summary of study design, methods, results, and conclusions (for specific guidance, see STARD for Abstracts)                                 | <b>2</b>              |
| <b>INTRODUCTION</b>      |            |                                                                                                                                                        |                       |
|                          | <b>3</b>   | Scientific and clinical background, including the intended use and clinical role of the index test                                                     | <b>3</b>              |
|                          | <b>4</b>   | Study objectives and hypotheses                                                                                                                        | <b>4</b>              |
| <b>METHODS</b>           |            |                                                                                                                                                        |                       |
| <i>Study design</i>      | <b>5</b>   | Whether data collection was planned before the index test and reference standard were performed (prospective study) or after (retrospective study)     | <b>5</b>              |
| <i>Participants</i>      | <b>6</b>   | Eligibility criteria                                                                                                                                   | <b>5</b>              |
|                          | <b>7</b>   | On what basis potentially eligible participants were identified (such as symptoms, results from previous tests, inclusion in registry)                 | <b>5</b>              |
|                          | <b>8</b>   | Where and when potentially eligible participants were identified (setting, location and dates)                                                         | <b>5</b>              |
|                          | <b>9</b>   | Whether participants formed a consecutive, random or convenience series                                                                                | <b>5</b>              |
| <i>Test methods</i>      | <b>10a</b> | Index test, in sufficient detail to allow replication                                                                                                  | <b>5</b>              |
|                          | <b>10b</b> | Reference standard, in sufficient detail to allow replication                                                                                          | <b>5</b>              |
|                          | <b>11</b>  | Rationale for choosing the reference standard (if alternatives exist)                                                                                  | <b>5</b>              |
|                          | <b>12a</b> | Definition of and rationale for test positivity cut-offs or result categories of the index test, distinguishing pre-specified from exploratory         | <b>5</b>              |
|                          | <b>12b</b> | Definition of and rationale for test positivity cut-offs or result categories of the reference standard, distinguishing pre-specified from exploratory | <b>5</b>              |
|                          | <b>13a</b> | Whether clinical information and reference standard results were available to the performers/readers of the index test                                 | <b>5</b>              |
|                          | <b>13b</b> | Whether clinical information and index test results were available to the assessors of the reference standard                                          | <b>5</b>              |
| <i>Analysis</i>          | <b>14</b>  | Methods for estimating or comparing measures of diagnostic accuracy                                                                                    | <b>6</b>              |
|                          | <b>15</b>  | How indeterminate index test or reference standard results were handled                                                                                | <b>6</b>              |
|                          | <b>16</b>  | How missing data on the index test and reference standard were handled                                                                                 | <b>6</b>              |
|                          | <b>17</b>  | Any analyses of variability in diagnostic accuracy, distinguishing pre-specified from exploratory                                                      | <b>6</b>              |
|                          | <b>18</b>  | Intended sample size and how it was determined                                                                                                         | <b>Not applicable</b> |
| <b>RESULTS</b>           |            |                                                                                                                                                        |                       |
| <i>Participants</i>      | <b>19</b>  | Flow of participants, using a diagram                                                                                                                  | <b>Not applicable</b> |
|                          | <b>20</b>  | Baseline demographic and clinical characteristics of participants                                                                                      | <b>5</b>              |
|                          | <b>21a</b> | Distribution of severity of disease in those with the target condition                                                                                 | <b>Not applicable</b> |
|                          | <b>21b</b> | Distribution of alternative diagnoses in those without the target condition                                                                            | <b>Not applicable</b> |
|                          | <b>22</b>  | Time interval and any clinical interventions between index test and reference standard                                                                 | <b>Not applicable</b> |
| <i>Test results</i>      | <b>23</b>  | Cross tabulation of the index test results (or their distribution) by the results of the reference standard                                            | <b>6</b>              |
|                          | <b>24</b>  | Estimates of diagnostic accuracy and their precision (such as 95% confidence intervals)                                                                | <b>Not applicable</b> |

|                   |    |                                                                                                       |                |
|-------------------|----|-------------------------------------------------------------------------------------------------------|----------------|
|                   | 25 | Any adverse events from performing the index test or the reference standard                           | Not applicable |
| DISCUSSION        |    |                                                                                                       |                |
|                   | 26 | Study limitations, including sources of potential bias, statistical uncertainty, and generalisability | 14             |
|                   | 27 | Implications for practice, including the intended use and clinical role of the index test             | 13             |
| OTHER INFORMATION |    |                                                                                                       |                |
|                   | 28 | Registration number and name of registry                                                              | 6              |
|                   | 29 | Where the full study protocol can be accessed                                                         | Not applicable |
|                   | 30 | Sources of funding and other support; role of funders                                                 | Not applicable |

**Supplementary Table S2.** Quantitative values of Roche total spike and Snibe neutralizing antibody responses after the first, second and third dose of inactivated virus or mRNA vaccine.

| Roche Total Spike Antibodies |                     |    |                             |                   | Snibe Neutralizing Antibodies |    |                            |                  |
|------------------------------|---------------------|----|-----------------------------|-------------------|-------------------------------|----|----------------------------|------------------|
|                              | Time Point          | n  | Median (95% CI)<br>(BAU/mL) | Range<br>(BAU/mL) | Time Point                    | n  | Median (95% CI)<br>(µg/mL) | Range<br>(µg/mL) |
| Inactivated virus vaccine    | 10 days post dose 1 | 30 | 0.4 (0.4-0.4)               | 0.4 – 20.6        | 10 days post dose 1           | 15 | 0.02 (0.002-0.02)          | 0 – 0.07         |
|                              | 20 days post dose 2 | 30 | 98.0 (60.6-190)             | 0.4 – 641         | 20 days post dose 2           | 16 | 0.38 (0.19-0.61)           | 0 – 1.17         |
|                              | 20 days post dose 3 | 12 | 525 (81.4-1301)             | 15.2 – 4067       | 20 days post dose 3           | 10 | 0.89 (0.18-1.89)           | 0.08 – 5.14      |
| mRNA vaccine                 | 10 days post dose 1 | 73 | 2.48 (1.38-4.16)            | 0.39 – 677        | 10 days post dose 1           | 73 | 0.05 (0.03-0.10)           | 0 – 1.71         |
|                              | 20 days post dose 2 | 68 | 2174 (1649-2484)            | 146 – 10363       | 20 days post dose 2           | 66 | 3.48 (2.71-3.99)           | 0.51 – 30.0      |
|                              | 20 days post dose 3 | 29 | 15004 (10452-22114)         | 3803-82203        | 20 days post dose 3           | 23 | 19.8 (11.9-29.4)           | 1.41 – 185       |

Abbreviations: CI: Confidence interval.

**Supplementary Table S3.** Gender group comparison of spike and neutralizing antibody responses between mRNA/inactivated virus vaccinees.

|                               |                        | Sinovac vaccinees            |                              | Pfizer vaccinees             |                              |
|-------------------------------|------------------------|------------------------------|------------------------------|------------------------------|------------------------------|
|                               | Time Point             | 20 days post dose 2          | 20 days post dose 3          | 20 days post dose 2          | 20 days post dose 3          |
| Roche Total Spike Antibodies  | Females                | 20                           | 7                            | 53                           | 19                           |
|                               | Median (BAU/mL)        | 110                          | 670                          | 2415                         | 15004                        |
|                               | Range (BAU/mL)         | 0.4-641                      | 15.2-1379                    | 146-10363                    | 3803-82203                   |
|                               | Males                  | 10                           | 5                            | 15                           | 10                           |
|                               | Median (BAU/mL)        | 87.9                         | 234                          | 1706                         | 16433                        |
|                               | Range (BAU/mL)         | 0.4-259                      | 20.8-4067                    | 208-2772                     | 5554-50595                   |
|                               | Difference (95% CI, p) | 34.1 (-49.9 to 129, p=0.37)  | 446 (-2747 to 1159, p=0.29)  | 723 (-74.7 to 1689, p=0.08)  | 1283 (-7951 to 9382, p=0.78) |
|                               | Time Point             | 20 days post dose 2          | 20 days post dose 3          | 20 days post dose 2          | 20 days post dose 3          |
| Snibe Neutralizing Antibodies | Females                | 10                           | 5                            | 51                           | 14                           |
|                               | Median (µg/mL)         | 0.34                         | 1.73                         | 3.74                         | 17.9                         |
|                               | Range (µg/mL)          | 0-1.17                       | 0.11-1.95                    | 0.51-30.0                    | 1.41-184.5                   |
|                               | Males                  | 6                            | 5                            | 15                           | 8                            |
|                               | Median (µg/mL)         | 0.46                         | 0.73                         | 2.72                         | 21.4                         |
|                               | Range (µg/mL)          | 0.04-1.08                    | 0.08-5.14                    | 0.92-4.38                    | 6.09-30.4                    |
|                               | Difference (95% CI, p) | 0.09 (-0.29 to 0.47, p=0.51) | 0.94 (-3.42 to 1.68, p=0.35) | 1.10 (-0.05 to 2.99, p=0.06) | 3.17 (-10.3 to 15.2, p=0.63) |

Abbreviations: CI: Confidence Interval.
